# Supplementary material
Source: publisher figshare collection journal article supplement (https://geolsoc.figshare.com/ndownloader/files/5426021)
Supplement: Supplementary file 1 [file 5426021]

Table. 1,,,,,,,
"Dunaldragh Psammite.  Quartzo-feldspathic, muscovite, biotite, schist",,,,,,,
"Alkali feldspar, rare garnet visible in thin section, interbeds of dark black albite schist.  Strong mica defined mineral lineation trending NNW.",,,,,,,
,,,,,,,
Malin Head Quartzite. Feldspathic Quartzite,,,,,,,
"Fine grained feldspathic quartzites, graded - right way up, generally pink coloured.  Prolific heavy mineral bands, interbeds of pelite.",,,,,,,
,,,,,,,
Rossfad Psammite. Feldspathic Quartz Schist,,,,,,,
"Heavily brecciated fault bound unit of usually coarse grained feldspathic, quartz, mica, schist with occasional pelitic intercalations. Strong foliation.",,,,,,,
,,,,,,,
Sand Port Quartzite. Feldspathic Quartzite,,,,,,,
"Graded, very coarse to fine grained quartzite, bed thickness up to 20 cm.",,,,,,,
Lackgolana Quartzite. Quartzite,,,,,,,
"Fine grained, thick bedded (metre scale) clean quartzite.  Rare pelitic partings and lenses of coarse feldspathic quartzite.  Occassional cross bedding.  ",,,,,,,
,,,,,,,
,,,,,,,
Lithological features of the rocks at Malin Head,,,,,,,
